# Supplementary material
Source: PubMed Central journal article supplement (PMC5865210)
Supplement: 41431_2017_20_MOESM3_ESM.pdf [file 41431_2017_20_MOESM3_ESM.pdf]

**Supplementary Table 2.** Total volume of activities prompted by ongoing care, CMA and WGS

| Specialist                   | Ongoing Care<br>(n=101) |       | CMA-/WGS-<br>(n=71) |      | CMA-/WGS+<br>(n=22) |        |
|------------------------------|-------------------------|-------|---------------------|------|---------------------|--------|
|                              |                         |       |                     |      |                     |        |
| Allergy & Immunology         | 5                       | 1.2%  | 0                   | 0.0% | 1                   | 3.8%   |
| Cardiology                   | 24                      | 5.6%  | 0                   | 0.0% | 4                   | 15.4%  |
| Dentistry                    | 7                       | 1.6%  | 0                   | 0.0% | 0                   | 0.0%   |
| Dermatology                  | 6                       | 1.4%  | 0                   | 0.0% | 0                   | 0.0%   |
| Developmental Assessment     | 9                       | 2.1%  | 0                   | 0.0% | 1                   | 3.8%   |
| Endocrinology                | 17                      | 4.0%  | 0                   | 0.0% | 0                   | 0.0%   |
| ENT                          | 21                      | 4.9%  | 0                   | 0.0% | 0                   | 0.0%   |
| Gastroenterology             | 16                      | 3.7%  | 0                   | 0.0% | 4                   | 15.4%  |
| Genetics                     | 89                      | 20.8% | 0                   | 0.0% | 2                   | 7.7%   |
| Gynecology                   | 2                       | 0.5%  | 0                   | 0.0% | 0                   | 0.0%   |
| Hematology                   | 9                       | 2.1%  | 0                   | 0.0% | 0                   | 0.0%   |
| Metabolics                   | 4                       | 0.9%  | 0                   | 0.0% | 0                   | 0.0%   |
| MFM/Perinatology/Neonatology | 7                       | 1.6%  | 0                   | 0.0% | 0                   | 0.0%   |
| Nephrology                   | 9                       | 2.1%  | 0                   | 0.0% | 0                   | 0.0%   |
| Neurology                    | 44                      | 10.3% | 0                   | 0.0% | 2                   | 7.7%   |
| Neurosurgery                 | 13                      | 3.0%  | 0                   | 0.0% | 1                   | 3.8%   |
| Oncology                     | 2                       | 0.5%  | 0                   | 0.0% | 1                   | 3.8%   |
| Ophthalmology/Optomety       | 39                      | 9.1%  | 0                   | 0.0% | 5                   | 19.2%  |
| Orthopedics                  | 23                      | 5.4%  | 0                   | 0.0% | 1                   | 3.8%   |
| Pharmacology                 | 0                       | 0.0%  | 0                   | 0.0% | 0                   | 0.0%   |
| Plastic/General Surgery      | 20                      | 4.7%  | 0                   | 0.0% | 0                   | 0.0%   |
| Psychiatry                   | 5                       | 1.2%  | 0                   | 0.0% | 0                   | 0.0%   |
| Pulmonology                  | 6                       | 1.4%  | 0                   | 0.0% | 1                   | 3.8%   |
| Rheumatology                 | 5                       | 1.2%  | 0                   | 0.0% | 0                   | 0.0%   |
| Urology                      | 9                       | 2.1%  | 0                   | 0.0% | 0                   | 0.0%   |
| Complex Care                 | 8                       | 1.9%  | 0                   | 0.0% | 0                   | 0.0%   |
| Palliative Care              | 1                       | 0.2%  | 0                   | 0.0% | 0                   | 0.0%   |
| Sleep Clinic                 | 8                       | 1.9%  | 0                   | 0.0% | 3                   | 11.5%  |
| Respiratory Medicine         | 12                      | 2.8%  | 0                   | 0.0% | 0                   | 0.0%   |
| Adolescent Medicine          | 2                       | 0.5%  | 0                   | 0.0% | 0                   | 0.0%   |
| Anaesthesia                  | 2                       | 0.5%  | 0                   | 0.0% | 0                   | 0.0%   |
| Other                        | 3                       | 0.7%  | 0                   | 0.0% | 0                   | 0.0%   |
| Sub-total                    | 427                     |       | 0                   |      | 26                  |        |
| <b>Allied health</b>         |                         |       |                     |      |                     |        |
| Audiology                    | 21                      | 16.2% | 0                   | 0.0% | 1                   | 8.3%   |
| Dietetics/Nutrition          | 17                      | 13.1% | 0                   | 0.0% | 2                   | 16.7%  |
| Occupational Therapy         | 20                      | 15.4% | 0                   | 0.0% | 3                   | 25.0%  |
| Physiotherapy                | 20                      | 15.4% | 0                   | 0.0% | 3                   | 25.0%  |
| Speech/Language              | 8                       | 6.2%  | 0                   | 0.0% | 2                   | 16.7%  |
| Genetic Counselling          | 38                      | 29.2% | 0                   | 0.0% | 0                   | 0.0%   |
| Psychology                   | 4                       | 3.1%  | 0                   | 0.0% | 0                   | 0.0%   |
| Support Group                | 1                       | 0.8%  | 0                   | 0.0% | 1                   | 8.3%   |
| Other                        | 1                       | 0.8%  | 0                   | 0.0% | 0                   | 0.0%   |
| Sub-total                    | 130                     |       | 0                   | 0.0% | 12                  | 100.0% |
| <b>Laboratory</b>            |                         |       |                     |      |                     |        |
| Genetic                      | 24                      | 88.9% | 6                   | 100% | 0                   | 0%     |

|                       |     |      |   |        |   |       |
|-----------------------|-----|------|---|--------|---|-------|
| Biochemical           | 2   | 7.4% | 0 | 0%     | 0 | 0%    |
| Other                 | 1   | 3.7% | 0 | 0%     | 2 | 100%  |
| Sub-total             | 27  |      | 6 |        | 2 |       |
| <b>Imaging</b>        |     |      |   |        |   |       |
| Skeletal Survey       | 4   | 2%   | 0 | 0.0%   | 0 | 0.0%  |
| Bone Age              | 3   | 1%   | 0 | 0.0%   | 0 | 0.0%  |
| MRS/4 or MRI          | 38  | 18%  | 0 | 0.0%   | 2 | 33.3% |
| Ultrasound            | 64  | 31%  | 0 | 0.0%   | 2 | 33.3% |
| CT                    | 5   | 2%   | 0 | 0.0%   | 0 | 0.0%  |
| Xray                  | 50  | 24%  | 0 | 0.0%   | 0 | 0.0%  |
| Echocardiogram        | 27  | 13%  | 1 | 100.0% | 1 | 16.7% |
| Ophthalmology imaging | 2   | 1%   | 0 | 0.0%   | 1 | 16.7% |
| Other                 | 14  | 7%   | 0 | 0.0%   | 0 | 0.0%  |
| Sub-total             | 207 |      | 1 |        | 6 |       |
