# Supplementary material
Source: PubMed Central journal article supplement (PMC5865210)
Supplement: 41431_2017_20_MOESM4_ESM.pdf [file 41431_2017_20_MOESM4_ESM.pdf]

**Supplementary Table 3.** Negative binomial regression results, total number of ongoing care activities based on age, sex and number of organs affect (n=101)

| <b>Coefficient</b>                      | <b>Estimate</b> | <b>Exp(Estimate)</b> | <b>Standard Error</b> | <b>p-value</b> |
|-----------------------------------------|-----------------|----------------------|-----------------------|----------------|
| Intercept                               | 2.00            | 7.41                 | 0.22                  | <0.001         |
| Age (ref: <12 months)                   |                 |                      |                       |                |
| 1-5 years                               | -0.11           | 0.89                 | 0.12                  | 0.363          |
| 6-10 years                              | -0.33           | 0.72                 | 0.15                  | 0.034          |
| >10 years                               | -0.37           | 0.69                 | 0.14                  | 0.008          |
| Sex (ref: male)                         |                 |                      |                       |                |
| Female                                  | 0.07            | 1.07                 | 0.10                  | 0.470          |
| Number of organs affected (ref: 1 to 2) |                 |                      |                       |                |
| 3 to 4                                  | 0.13            | 1.14                 | 0.22                  | 0.543          |
| 5 to 6                                  | 0.24            | 1.27                 | 0.22                  | 0.282          |
| 7 to 8                                  | 0.36            | 1.43                 | 0.22                  | 0.105          |
| 9 or more                               | 0.45            | 1.56                 | 0.22                  | 0.042          |
